# 1 **Microbial Cells Harboring a Mitochondrial** 2 **Gene Are Capable of CO<sub>2</sub> Capture**

3  
4 Yanchao Zhou<sup>a,\*</sup>, Lan Ouyang<sup>a,\*</sup>, Xiao Yi<sup>a,\*</sup>, Tao Gan<sup>a,b,\*</sup>, Jinhuan Qi<sup>a,\*</sup>, Yulin Wan<sup>a,\*</sup>,  
5 Yuchuan Wang<sup>c</sup>, Shanshan An<sup>a</sup>, Yunfan Shi<sup>a</sup>, Wei Yang<sup>a</sup>, Wenzhe Chen<sup>a</sup>, Zhiyao Luo<sup>a</sup>,  
6 Jing Li<sup>a,d</sup>, Jun Luo<sup>e</sup>, Xiren Nuertai<sup>a</sup>, Xiang Zhu<sup>a</sup>, Fan Yang<sup>a</sup>, Beibei Zhao<sup>a</sup>, Weiwei  
7 Zhang<sup>a</sup>, Zi-Wei Ye<sup>f</sup>, Xiaoxiao Zhang<sup>a</sup>, Shaoping Weng<sup>a</sup>, Qiuyun Liu<sup>a</sup>, Weiguo Cao<sup>a,d</sup>  
8 & Jianguo He<sup>a</sup>

9  
10 <sup>a</sup>State Key Laboratory of Biocontrol, Guangdong Provincial Key Laboratory of  
11 Improved Variety Reproduction in Aquatic Economic Animals, Biomedical Center,  
12 Lab of Microbial Metabolic Engineering and Synthetic Biology, School of Life  
13 Sciences, Sun Yat-sen University, Guangzhou 510275, China.

14 <sup>b</sup>Department of Biotechnology, School of Basic Medicine, Gannan Medical  
15 University, Ganzhou 34100, China.

16 <sup>c</sup>School of Chemistry, Sun Yat-sen University, Guangzhou 510275, China.

17 <sup>d</sup>Department of Genetics and Biochemistry, Clemson University, Clemson, SC 29634,  
18 USA.

19 <sup>e</sup>Department of Mathematical Sciences, Clemson University, Clemson, SC 29634,  
20 USA.

21 <sup>f</sup>Department of Microbiology, The University of Hong Kong, China.

22  
23 \*These authors contributed equally to this work.

24 Correspondence and requests for materials should be addressed to Q.L. (lsslq@mail.  
25 sysu.edu.cn), W.C. (wgc@clemson.edu) or to J.H. (lsshjg@mail.sysu.edu.cn)

26

27

28 **ABSTRACT** Global warming is escalating with increased temperatures reported  
29 worldwide. Given the enormous land mass on the planet, biological capture of CO<sub>2</sub>  
30 remains a viable approach to mitigate the crisis as it is economical and easy to  
31 implement. In this study, a gene capable of CO<sub>2</sub> capture was identified via selection in  
32 minimal media. This mitochondrial gene named as *OG1* encodes the OK/SW-CL.16  
33 protein and shares homology with cytochrome oxidase subunit III of various species  
34 and PII uridylyl-transferase from *Loktanella vestfoldensis* SKA53. CO<sub>2</sub> capture  
35 experiments indicate that  $\delta^{13}\text{C}$  was substantially higher in the cells harboring the gene  
36 *OG1* than the control in the nutrition-poor media. This study suggests that CO<sub>2</sub>  
37 capture using engineered microorganisms in barren land can be exploited to address  
38 the soaring CO<sub>2</sub> level in the atmosphere, opening up vast land resources to cope with  
39 global warming.

40 **IMPORTANCE** Global warming crisis is deteriorating with increased CO<sub>2</sub> levels in  
41 the atmosphere each year. Action must be taken before catastrophic consequences  
42 occur in the not-so-distant future. Biological capture of CO<sub>2</sub> is a feasible approach to  
43 alleviate the current crisis. We have identified a mitochondrial gene which  
44 demonstrated CO<sub>2</sub> utilization capability. Data presented in this study suggest that  
45 CO<sub>2</sub> capture using engineered microorganisms can be harnessed to address the  
46 ever-rising CO<sub>2</sub> level in the atmosphere.

47

48 **KEYWORDS** CO<sub>2</sub> capture, OK/SW-CL.16,  $\delta^{13}\text{C}$ , cytochrome oxidase subunit III

49

50

51

52 It is widely believed that the combustion of fossil fuel contributes to the rising  
53 CO<sub>2</sub> level in the atmosphere, by a surge of estimated 100 ppm since its pre-industrial  
54 level<sup>1</sup>. Global temperature has risen by more than half a degree in the past 50 years as  
55 a result of greenhouse gas emissions. Current technologies for carbon capture and  
56 storage and chemical fixation of CO<sub>2</sub> are varied<sup>2</sup>. The amount of CO<sub>2</sub> captured  
57 relative to the magnitude of CO<sub>2</sub> emitted and energy required are two major concerns.  
58 From this point of view, biological CO<sub>2</sub> capture is a viable approach with minimal  
59 energy demand. Here we describe the cloning of a mitochondrial gene which is able  
60 to capture CO<sub>2</sub>, and the engineered microbes showed great potential in addressing the  
61 global warming issues.

62

## 63 **Results**

64 To search for genes that can capture CO<sub>2</sub>, we constructed and screened a random  
65 DNA library. The effort has ended with a sequence from an unknown DNA library,  
66 which shares homology with the genome of *Homo sapiens* haplogroup H63  
67 mitochondrion (Supplementary Fig. S1) and gave rise to *Escherichia coli* colonies in  
68 nitrogen free media. More importantly, these colonies were later shown to be able to  
69 grow on carbon deficient media. Supplement in rich media Luria Broth with vitamin  
70 C was essential for the successful sequencing of the positive clone pOG, suggesting  
71 that the OG-encoded protein might catalyzes a stressful oxidative reaction. The  
72 protein encoded in the subclone pOG1 is identical to a known protein OK/SW-CL.16<sup>3</sup>,  
73 which shares homology with PII uridylyl-transferase from *L. vestfoldensis* SKA53  
74 and cytochrome oxidase subunit III from *Macaca mulatta* (Supplementary Fig. S2).  
75 The OK/SW-CL.16 protein harbors a class I PxxP motif, a predicted  
76 actinin-interacting region, and a RIM1-like sequence<sup>3</sup>. Previous study has shown that  
77 OK/SW-CL.16 acted as a binding partner for actinin-4<sup>3</sup>.

78 Yeast extract was included in carbon-free media to allow proton traffic and  
79 attenuate osmotic pressure since its peptide and protein constituency are rich in  
80 charged amino acids and hydrogen bond donors and acceptors (Supplementary Fig.

81 S3 and S4). Without supplement of minimal amount of proteins and peptides, pOG1  
82 grew very poorly in carbon free nutrition-poor liquid media (Supplementary Fig. S3).

83 The commercially available  $^{13}\text{C}$ -Urea Breath Test was based on the release of  
84  $\text{CO}_2$  by urease<sup>4,5</sup>. It was adapted in this study to investigate the potential capacity of  
85  $\text{CO}_2$  capture using our clones. Isotopic measurements at the end of carbon fixing  
86 experiments (Fig. 1; Supplementary Tables S1-S8) indicate that  $\delta^{13}\text{C}$  was substantially  
87 different between the clones harboring OG1 gene and the control clone in both *E. coli*  
88 and *Saccharomyces cerevisiae* (Fig. 1A and 1D), suggesting that the clones harboring  
89 OG1 gene may have higher assimilation rate toward  $\text{CO}_2$ . Since microbial cells were  
90 submerged in 50 ml liquid media without shaking, it suggests that engineered  
91 microbial cells might be able to capture  $\text{CO}_2$  under surface soil. ATP supplement  
92 diminished the  $\text{CO}_2$  fixing activity of the pOG1 clone (Fig. 1A). Although a clone  
93 pOGDR1 obtained from directed evolution had significantly higher  $\delta^{13}\text{C}$  than pOG1  
94 clone at pH 8.0, its  $\delta^{13}\text{C}$  value was lower than that of pOG1 clone at pH 7.0 (Fig. 1G  
95 and 1J; Table 1), suggesting that proton traffic may be integral in  $\text{CO}_2$  capture.  
96 Treatments with the carbonic anhydrase inhibitor acetazolamide generated no  
97 difference in  $\delta^{13}\text{C}$  patterns between pOG1 groups and pSK- groups ( $p=0.567$ ; Fig. 2,  
98 S9 and S10), suggesting that spontaneous hydration of  $\text{CO}_2$  was present. Alternatively,  
99 the *E. coli* carbonic anhydrase may be insensitive to acetazolamide. *OG1* was highly  
100 expressed in engineered *E. coli* host cells, which was determined via Realtime  
101 fluorescent quantitative PCR (Fig. 3; Supplementary Tables S11 and S12).

102

## 103 Discussion

104 The subclone pOG1, identical to a known protein OK/SW-CL.16, shares homology  
105 with numerous proteins including Cytochrome c oxidase subunit III. It is a constituent  
106 of the multi-subunit cytochrome c oxidase, and part of the respiratory chain  
107 of mitochondria and aerobic bacteria<sup>6,7</sup>. It catalyzes the following reaction:

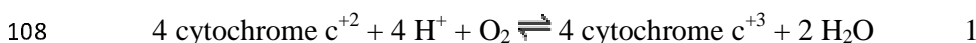

109 The utilization of the four protons above might be tied to the hydration of CO<sub>2</sub>  
110 below, which leads to dissociation of protons and generation of bicarbonic acid.

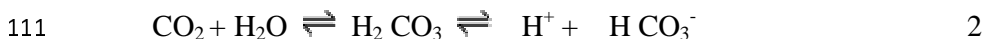

112 Bicarbonic acid could be assimilated as carbon source<sup>8</sup>, and accumulated protons  
113 could be utilized by OGI protein in the aforementioned first reaction coupled with  
114 second reaction via proton traffic to produce water molecules without generating  
115 excessive osmotic pressure.

116 The pOG1 clone was initially isolated in nitrogen free media. Although acetylene  
117 reduction assays indicated no obvious nitrogen fixation activity with pOG1 clone,  
118 weak activity may arise endogenously in the host upon the potential regulation by the  
119 OK/SW-CL.16 protein that shares homology with PII uridylyl-transferase, which acts  
120 as regulator of the cellular nitrogen and carbon status in prokaryotes and plants<sup>9</sup>, such  
121 as NifA activity regulation and ammonium-dependent post-translational regulation of  
122 nitrogenase in *H. seropedicae*<sup>10</sup>.

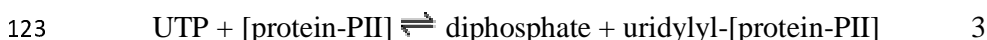

124 In response to nitrogen limitation, the uridylylated PII protein promotes  
125 deadenylation of glutamine synthetase (GlnA), consequently activates the enzyme  
126 and stimulates NtrC-dependent promoters<sup>11</sup>.

127 The P108T substitution in pOGDR1 had profound impact on carbon fixing  
128 outcome in media with different pH values. The  $\sigma_{22}$  elements of the <sup>13</sup>C chemical shift  
129 anisotropy for the deprotonated carboxyl groups indicate stronger hydrogen bonding  
130 of carbonyl oxygen in threonine than that in either proline or serine<sup>12</sup>. The  
131 electron-withdrawing inductive effect of the hydroxyl oxygen atom renders the  
132 hydroxyl oxygen in  $\beta$ -branched threonine less chemically active than its counterpart  
133 in serine, for instance, in the formation of hydrogen bonds. These properties will  
134 impact enzyme catalysis by the protein of OK/SW-CL.16 variant as a whole. The  
135 potentially non-casual connection between respiration chain or ATP's effect and CO<sub>2</sub>  
136 usage suggests that the mitochondrial genome may harbor other genes for CO<sub>2</sub> capture.  
137 Another potential application of the *OGI* gene would be serving as a selective marker

138 by growing on carbon deficient minimal media and replacing antibiotic selective  
139 markers in constructed plasmid.

140 Given the minimal nutrition it requires and potential regulation by soil ions and  
141 other substances on proton traffic, the pOG1 clone could be dispersed in barren lands  
142 to capture large amount of atmospheric CO<sub>2</sub> to cope with escalating global warming  
143 crisis.

144

## 145 **Methods**

146 **Cloning and Subcloning of the gene capable of CO<sub>2</sub> capture.** Chimeric DNA  
147 fragments encoding *S. cerevisiae*  $\alpha$ -factor secretion signal and random peptides were  
148 generated from PCR amplifications of pPICZ $\alpha$ A (Invitrogen, Carlsbad, CA, USA)  
149 linearized with BamH I. The two primers were: (1)  
150 GCGGATCCAAAATGAGATTTCTTCAA;(2)CGTCTAGATCAACCN(T/C)(G/  
151 C/T)N(T/C)(G/C/T)ACAN(T/C)(G/C/T)N(T/C)  
152 (G/C/T)ACCAGATGGN(T/C)(G/C/T)N(T/C)(G/C/T)  
153 ACAN(T/C)(G/C/T)N(T/C)(G/C/T)AGATCTTTTCTCGAGAGATACCC. PCR  
154 reactions were performed using *Pfu* and *Taq* DNA polymerases (Takara, Dalian,  
155 China) in the presence of 2.5% pyrrolidone (Tokyo Kasei Kogyo Co. Ltd., Chuo-ku,  
156 Japan). After a preheating step at 94 °C for 2 min, PCR amplification was performed  
157 with 40 cycles of incubation at 95 °C for 20 s, 20 °C for 60 s and 72 °C for 30 s, and a  
158 final extension at 72 °C for 5 mins. PCR product was ethanol precipitated and dried.  
159 Double digestion with Xba I and BamH I was subsequently conducted for 5 h.  
160 pYES2/CT-ADH2 Vector<sup>13</sup> was triple digested with *BamH* I, *Xho* I and *Xba* I<sup>14</sup>, and  
161 then ligated with double digested PCR product at 6 °C overnight. Ligation mixture  
162 was electroporated to *E. coli* ORIGAMI cells (Novagen, Madison, WI, USA) at 12.5  
163 kV/cm, followed by plating to nitrogen fixation media (M9 media with NH<sub>4</sub>Cl  
164 removed, and supplemented with 1% sucrose as carbon source)<sup>15</sup>. One colony  
165 appeared after growing at 30 °C for 3 days. The positive clone pOG was unable to

166 grow after 3-month storage at the -20 °C freezers, and subsequently revived by 1-min  
167 UV irradiation in a laminar hood followed by plating to nitrogen fixation media  
168 described above. It was then successfully sequenced only after adding 5 mg/L  
169 Vitamin C to LB for cell propagation. pOG was subsequently amplified with Taq  
170 DNA polymerase with the following 2 primers:  
171 F0: GACGGTATCGATAAGCTTGATATCGAATTCATGACCCCTAACAGGGG  
172 C; PB2:  
173 ACTAGTGGATCCCCGGGCTGCAGCTATGGTGAGCTCAGGTGATTGATAC  
174 TCCTGATGC. After a preheating step at 94 °C for 3 mins, PCR amplification was  
175 performed with 35 cycles of incubation at 95 °C for 20 s, 42 °C for 45 s and 72 °C for  
176 90 s, and a final extension at 72 °C for 5 mins. The PCR product was purified with the  
177 QIAquick gel extraction kit (QIAGEN, GmbH, Hilden, Germany) per manufacture's  
178 instruction. Both PCR amplicons and SK- vector were double digested with *EcoR* I  
179 and *BamH* I at 37 °C for 4 h, which were subsequently purified with the QiaQuick kit.  
180 Ligation was carried out at 16 °C overnight before electroporating into *E. coli*  
181 MG1655 cells. Positive clone pOG1 was identified after plasmid sequencing.

182 **<sup>13</sup>C-CO<sub>2</sub> assimilation assays.** pSK- clone and pOG1 clone in MG1655, and MG1655  
183 cells were inoculated to LB respectively, and propagated at 37 °C at 120 rpm for 19 h.  
184 The cell pellets were washed once with sterile water and resuspended in sterile water.  
185 4 OD (600 nm) of cells were inoculated to 50 ml CO<sub>2</sub> capture media (0.02% YNB  
186 (Yeast Nitrogen Base, nitrogen free, Amresco, Inc., Solon, Ohio), 0.01 % ammonia  
187 sulfate, 0.04% yeast extract, pH 8.0 adjusted with NaOH) with ampicillin (60 mg/L)  
188 or no ampicillin for MG1655. Six layers of cheese cloth were used as caps to allow  
189 CO<sub>2</sub> in. Vacuum desiccator was adapted for use with atmosphere inside. CO<sub>2</sub> was  
190 released by hydrolysis of 6 mg urea-<sup>13</sup>C (99 atom %, Sigma Aldrich, Missouri, USA)  
191 by 0.2 mg of urease from Jack Bean (Tokyo Chemical Industry Co. Ltd., Chuo-ku,  
192 Tokyo, Japan) in PBS (pH 7.4) in a total volume of 150 µl. The apparatus was sealed  
193 with Vaseline, and cells were cultured inside for 96 h at 30 °C. *E. coli* MG1655 cells  
194 was cultured outside of the device with ordinary airtight cap at the same temperature

195 and with the same incubation time. Subsequently absorbance at 600 nm was measured.  
196 Bacteria were centrifuged for 10 min at 7084 x g, and the pellets were washed with  
197 20-30 ml of sterile water and mixed well followed by centrifugation for 5 min at 7084  
198 x g. Pellets were transferred to 1.5 ml Eppendorf tubes followed by drying at 60 °C  
199 for 1 h. For *S. cerevisiae*: Sample PYES2OG1 clone and control pYES2/CT/ $\alpha$ -Factor  
200 clone in INVSc1 were divided into two groups with five replicates each. 5 OD (600  
201 nm) of cells were inoculated to 50 ml CO<sub>2</sub> capture media (0.02% YNB, 0.01 %  
202 ammonia sulfate, 0.04% yeast extract, pH 8.0 adjusted with NaOH, adding 1x amino  
203 acids concentrate of final concentration before use) with ampicillin (100 mg/L). 100 x  
204 amino acids concentrate (Ura<sup>-</sup>) contained 5 g Adenine, 5 g leucine, 5 g tryptophan and  
205 2.5 g histidine per liter. CO<sub>2</sub> was released by hydrolysis of 6 mg urea-<sup>13</sup>C (99 atom %,  
206 Sigma Aldrich, Missouri, USA) by 0.2 mg of urease from Jack Bean (Tokyo Chemical  
207 Industry Co. Ltd., Chuo-ku, Tokyo, Japan) in 10 mM PBS (pH 7.4) in a total volume  
208 of 150  $\mu$ l. The rest is as described above.

209

210 **Determination of stable carbon and nitrogen isotope ratio.** Experiments were  
211 carried out in the Environmental Stable Isotope Lab, Chinese Academy of  
212 Agricultural Sciences<sup>16</sup>. 2-4 mg of sample was weighed in a tin foil cup, and was  
213 subsequently introduced into the elemental analyzer (Vario PYRO cube, Elementar,  
214 Germany) through an automatic sampler, where the sample was burned and reduced  
215 into pure CO<sub>2</sub> and N<sub>2</sub>. The gases were further diluted in a dilution apparatus, and  
216 measured in the stable isotope ratio mass spectrometer (IsoPrime100, Isoprime,  
217 England). The detailed running parameters were as follows: Elemental Analyzer:  
218 Burner temperature: 1020 °C; Reducing furnace temperature: 650 °C; He carrier gas  
219 flow rate: 230 mL/min. Dilution Apparatus: He dilution pressure: 4 bar; CO<sub>2</sub>  
220 reference gas pressure: 8 psi; N<sub>2</sub> reference gas pressure: 8 psi. Mass Spectrometer:  
221 CO<sub>2</sub> reference gas was calibrated *via* USGS24 ( $\delta^{13}\text{C}_{\text{PDB}} = -16\%$ ) through two point  
222 corrections, and the results were corrected by USGS24 and IAEA600 ( $\delta^{13}\text{C}_{\text{PDB}} =$



223 -27.5‰). N<sub>2</sub> reference gas was calibrated *via* IAEA N1 ( $\delta^{15}\text{N}_{\text{air}} = 0.4\text{‰}$ ), and the  
224 results were corrected by IAEA N1 and USGS43 ( $\delta^{14}\text{N}_{\text{air}} = 8.44\text{‰}$ ).

225

226 **Liquid culture in carbon fixing media with or without yeast extract.** Carbon  
227 fixing medium A contained 0.2 g/L YNB, 0.1 g/L ammonia sulfate, 0.4 g/L yeast  
228 extract, with sodium hydroxide adjusting pH equal to 8.0, supplemented with 100  
229  $\mu\text{g/ml}$  ampicillin. Medium B was as above but free of yeast extract. Two samples  
230 designated pOG1 and SK- in *E. coli* MG1655 were propagated overnight in LB  
231 medium with 100  $\mu\text{g/ml}$  ampicillin at 37 °C and aerated by shaking at 220 rpm.  
232 Cultures were centrifuged for 10 min at 6000 rpm and washed with sterile ultrapure  
233 water twice after reaching logarithmic phase. The washed bacteria with OD<sub>600nm</sub> of  
234 0.2 were inoculated into carbon fixing medium with 100  $\mu\text{g/ml}$  ampicillin. Each group  
235 had four replicates. OD<sub>600nm</sub> was determined after incubation at 30 °C for 3 days  
236 (Supplementary Fig. S3).

237

238 **pH tolerance test.** Carbon fixing medium contained 0.2 g/L YNB, 0.1 g/L ammonia  
239 sulfate, 0.4 g/L yeast extract, with sodium hydroxide adjusting pH equal to 5.0, 6.0,  
240 7.0, 8.0 and 9.0 respectively. Bacterial cultures were propagated overnight in LB  
241 medium with 100  $\mu\text{g/ml}$  ampicillin at 37 °C with shaking at 180 rpm. Cultures were  
242 centrifuged for 5 min at 6000 rpm and washed with sterile ultrapure water twice after  
243 reaching logarithmic phase. The washed bacteria with OD<sub>600nm</sub> of 0.01 were  
244 inoculated into carbon fixing media with 100  $\mu\text{g/ml}$  ampicillin, Each sample had three  
245 replicates with 5 ml liquid media in the tubes. OD<sub>600nm</sub> was determined after  
246 incubation at 30 °C for 12 h (Supplementary Fig. S4).

247

248 **Construction of a *S. cerevisiae*/*E. coli* Shuttle Vector.** pOG1 in *E. coli* was  
249 propagated overnight in LB medium with 100  $\mu\text{g/ml}$  ampicillin at 37 °C at 220 rpm.  
250 *OGI* gene was amplified with AlphaOG1 primer  
251 5'-TCTCTCGAGAAAAGAATGACCCCTAACAGGG and 3OG1 primer

252 5'-GATCTAGACTATGGTGAGCTCAGG. The PCR mixture (50  $\mu$ l) consisted of 5  $\mu$ l  
253 of 10x PCR Buffer ( $Mg^{2+}$  plus), 1  $\mu$ l of template, 1.5  $\mu$ l of 10 mM dNTP mix, 1 $\mu$ l of  
254 10 mM upstream primer, 1  $\mu$ l of 10 mM downstream primer, 0.3  $\mu$ l of Taq enzyme (5  
255 U/ $\mu$ l), and sterilized distilled water up to 50  $\mu$ L. PCR conditions were as follows: 2  
256 min initial denaturation at 94  $^{\circ}$ C; then 35 cycles of 95  $^{\circ}$ C for 20 s, 55  $^{\circ}$ C for 45 s, 72  
257  $^{\circ}$ C for 90 s; and finally 60 s at 72  $^{\circ}$ C. PCR products were purified by Gel&PCR  
258 purification kit (Promega, Madison, WI, USA). The PCR amplicons and  
259 pYES2/CT/ $\alpha$ -factor (Changsha Yingrun Biotechnology Co., China) were digested  
260 with *Xho* I and *Xba* I for 4 hours at 37  $^{\circ}$ C, followed by inactivation at 70  $^{\circ}$ C for 10  
261 minutes and ligation at 16  $^{\circ}$ C. The ligation products were purified via Gel&PCR  
262 purification kit, and electroporated into *E. coli* DH5 $\alpha$ , which was then plated on a LB  
263 agar plate supplemented with 100  $\mu$ g/ml ampicillin and incubated overnight at 37  $^{\circ}$ C.  
264 The positive colonies were verified by PCR followed by sequencing. The resultant  
265 plasmid was designated pYES2OG1.

266

267 **Directed evolution.** pOG1 clone in *E. coli* was propagated overnight in LB medium  
268 with 100  $\mu$ g/ml ampicillin at 37  $^{\circ}$ C at 220 rpm. *OG1* gene was amplified with OG1F0  
269 primers 5'-TCGAATTCATGACCCCTAACAGGG and OG1R0 primers  
270 3'-AGTGGATCCCCGGGCTGCAGCTATGGTGAGCTCAGG. Instant Error-prone  
271 PCR Kit was a product of Beijing Tianenze Gene Technology Co., Ltd. (Beijing,  
272 China)<sup>17</sup>. The Error-Prone PCR mixture consisted of 5  $\mu$ l of 10x Error-Prone PCR  
273 mix, 5  $\mu$ l of 10x Error-Prone PCR proprietary dNTP, 5  $\mu$ l of 5mM  $MnCl_2$ , 1  $\mu$ l of  
274 template, 0.5  $\mu$ l of 10 $\mu$ M upstream primer and downstream primer each, 0.6  $\mu$ l of Taq  
275 DNA polymerase (5 U/ $\mu$ l), and sterilized distilled water up to 50  $\mu$ l. Error-Prone PCR  
276 conditions were as follows: 40 cycles of 98  $^{\circ}$  for 10 s, 55  $^{\circ}$ C for 55 s, 72  $^{\circ}$ C for 60 s.  
277 PCR products were purified by Gel&PCR purification kit. Both PCR amplicons and  
278 pSK- vector were double digested with *EcoR* I and *BamH* I at 37  $^{\circ}$ C for 4 h, followed  
279 by inactivation at 80  $^{\circ}$ C for 15 minutes and ligation at 16  $^{\circ}$ C. The ligation products  
280 were purified and recovered by Gel&PCR purification kit, and electroporated into *E.*

281 *coli* DH5a cells, followed by plating on a LB agar plate supplemented with 100  
282  $\mu\text{g}/\text{mL}$  ampicillin and incubating overnight at 37 °C. The positive colonies were  
283 verified by colony PCR followed by sequencing. The resultant plasmid was named  
284 pOGDR1, pOGDR2, pOGDR3, pOGDR4, pOGDR5, pOGDR6, pOGDR7,  
285 pOGDR10. After an initial one-sample screening via isotopic experiment, clones with  
286 higher carbon fixing activities were further investigated in subsequent experiments.

287

288 **Real-time fluorescent quantitative PCR.** The experiment was contracted with  
289 FitGene BioTechnology Co., LTD (Guangzhou, China)<sup>18</sup>. Briefly, an aliquot of the six  
290 samples were collected at the end of a 4-day carbon fixing experiment. RNA was  
291 extracted using RNAPrep Pure Cell/Bacteria Kit according to the instructions of the  
292 manufacturer (TIANGEN Biotech Co., Ltd, Beijing, China). The RNA purity was  
293 determined by UV spectrophotometer SMA4000 (Merinton, China). The RNA was  
294 added to the gDNA adsorption column and centrifuged at 10000 g for 1 min at room  
295 temperature for removal of genomic DNA. The RNA was thermal denatured at 65 °C,  
296 and immediately cooled on ice for 2 min, and used as template for reverse  
297 transcription. Synthesis of cDNA was performed in 10  $\mu\text{L}$  reactions per  
298 manufacturer's instructions. After the reaction, the cDNA was diluted 5 times with  
299 sterilized deionized water and kept at -20 °C. Real-time fluorescent quantitative PCR  
300 was then conducted. 20  $\mu\text{l}$  PCR reactions containing template cDNA, 1x Bestar®  
301 SybrGreen qPCR Mastermix, 1x ROX, 0.2  $\mu\text{M}$  of each primer, and sterilized distilled  
302 water were performed in an ABI7500 thermal cycler (Life Technologies, Carlsbad,  
303 CA, USA). The cycling conditions comprised 2 min polymerase activation at 95 °C,  
304 45 cycles at 95 °C for 10 seconds, 60 °C for 34 s (Fluorescence signal acquisition) and  
305 72 °C for 30 s. In the end of the cycle, melting curve from 60 °C to 98 °C was  
306 obtained. The specificity of the amplifications was verified by melt curve analysis.  
307 Gene expression levels were normalized ( $\Delta\Delta\text{Ct}$  analysis) to 16S rRNA gene  
308 expression levels from the same sample. Gene expression from relative real-time  
309 quantitative PCR experiment was determined using  $2^{-\Delta\Delta\text{CT}}$  method. All data are

310 expressed as the means  $\pm$  standard deviation.

311

312 **Treatments with carbonic anhydrase inhibitor acetazolamide on CO<sub>2</sub> capture.**

313 pSK- clone and pOG1 clone in *E. coli* MG1655 were each divided into two groups  
314 according to the presence (+) or absence (-) of 50  $\mu$ g/ml acetazolamide (Sigma,  
315 Missouri, USA) in the media. Each group had three duplicates. CO<sub>2</sub> capture experiment  
316 was conducted as aforementioned.

317

318 **Statistical analyses.** Statistical analyses were performed using SPSS 22.0. The  
319 experiments were evaluated using the Univariate General Linear Model or  
320 independent samples-T test when data were normal distributed or approximately  
321 normal distributed after examining with Shapiro-Wilk tests. The alpha level for all  
322 tests was 0.05. Games-Howell post hoc tests were conducted when equal variance was  
323 not assumed.

324 The OG sequence in the original positive clone has been deposited in GenBank  
325 with the accession number of KX255659. *OGI* sequence is identical to a GenBank  
326 sequence with the accession number NC\_012920, ranging from 9251 to 9655 bp. Its  
327 encoded protein OK/SW-CL.16 was previously deposited in GenBank with the  
328 accession number of BAB93516.

329

330 **Data Availability.** All data generated or analyzed during this study are included in  
331 this published article and its Supplementary Information file.

332

333 **References**

- 334 1. Yu, K. M. K., Curcic, I., Gabriel, J. & Tsang, S. C. E. Recent Advances in  
335 CO<sub>2</sub> Capture and Utilization. *ChemSusChem* **1**, 893-899 (2008).
- 336 2. Macdowell, N. *et al.* An overview of CO<sub>2</sub> capture technologies. *Energ. Environ.*  
337 *Sci.* **3**, 1645-1669 (2010).
- 338 3. Togashi, M. *et al.* Interaction of alpha-actinin-4 with class I PxxP  
339 motif-containing OK/SW-CL.16 protein. *Nephron Exp. Nephrol.* **107**, e65-72  
340 (2007).
- 341 4. Chey, W. D., Wong, B. C. & Practice Parameters Committee of the American  
342 College of Gastroenterology. American College of Gastroenterology guideline on  
343 the management of *Helicobacter pylori* infection. *Am. J. Gastroenterol.* **102**,  
344 1808-1825 (2007).
- 345 5. Malfertheiner, P. *et al.* Current concepts in the management of *Helicobacter*  
346 *pylori* infection: the Maastricht III Consensus Report. *Gut* **56**, 772-781 (2007).
- 347 6. Belevich, I., Verkhovsky, M. I. and Wikström, M. Proton-coupled electron  
348 transfer drives the proton pump of cytochrome c oxidase. *Nature* **440**, 829-832  
349 (2006).
- 350 7. Michel, H. Cytochrome c oxidase: catalytic cycle and mechanisms of proton  
351 pumping--a discussion. *Biochemistry* **38**, 15129-15140 (1999).
- 352 8. Cramer, M. D., Lewis, O. A. M. & Lips, S. H. Inorganic carbon fixation and  
353 metabolism in maize roots as affected by nitrate and ammonium nutrition.  
354 *Physiol. Plantarum* **89**, 632-639 (1993).
- 355 9. Garcia, E. & Rhee, S. G. Cascade control of *Escherichia coli* glutamine  
356 synthetase. Purification and properties of PII uridylyltransferase and  
357 uridylyl-removing enzyme. *J. Biol. Chem.* **258**, 2246-2253 (1983).
- 358 10. Noindorf, L. *et al.* Role of PII proteins in nitrogen fixation control of

- 359       Herbaspirillum seropedicae strain SmR1. *BMC Microbiol.* **11**, 8 (2011).
- 360   11. Perlova, O., Nawroth, R., Zellermann, E. M. & Meletzus, D. Isolation and  
361       characterization of the *glnD* gene of *Gluconacetobacter diazotrophicus*, encoding  
362       a putative uridylyltransferase / uridylyl-removing enzyme. *Gene* **297**, 159-168  
363       (2002).
- 364   12. Gu, Z., Zambrano, R. & McDermott, A. Hydrogen bonding of carboxyl groups in  
365       solid-state amino acids and peptides: comparison of carbon chemical shielding,  
366       infrared frequencies, and structures. *J. Am. Chem. Soc.* **116**, 6368-6372 (1994).
- 367   13. Wang, S. *et al.* Isolation of oligopeptides targeting Ras-Raf interactions via  
368       reverse two hybrid assays. *Biotechnology* **24**, 58-63 (2014).
- 369   14. Xu, Z. *et al.* Isolation of novel sequences targeting highly variable viral protein  
370       hemagglutinin. *MethodsX* **2**, 64-71 (2015).
- 371   15. Sambrook, J., Maniatis, T. & Fritsch, E. F. *Molecular cloning: A Laboratory*  
372       *Manual* (Cold Spring Harbor Laboratory Press, 1989).
- 373   16. Johnson, C. A., Stricker, C. A., Gulbransen, C. A. & Emmons, M. P. 2018,  
374       Determination of  $\delta^{13}\text{C}$ ,  $\delta^{15}\text{N}$ , or  $\delta^{34}\text{S}$  by isotope-ratio-monitoring mass  
375       spectrometry using an elemental analyzer: U.S. Geological Survey Techniques  
376       and Methods, book 5, chap. D4, 19 p.
- 377   17. Leung, D. W., Chen, E. & Goeddel, D. V. A method for random mutagenesis of a  
378       defined DNA segment using a modified polymerase chain reaction. *Technique* **1**,  
379       11-15 (1989).
- 380   18. Jothikumar, N. & Griffiths, M. W. Rapid detection of *Escherichia coli* O157:H7  
381       with multiplex real-time PCR assays. *Appl. Environ. Microbiol.* **68**, 3169-3171  
382       (2002).
- 383

384 **Acknowledgements**

385 This work was supported by grants from the Guangzhou Science and Technology  
386 Program (201804010328); Guangdong Science and Technology Program  
387 (2016B020204001, 2008B020100001); Guangdong Natural Science Foundation  
388 (S2011010004264); The National Natural Science Foundation of China (30370799)  
389 and The Science and Technology Transformation Program of Sun Yat-sen University  
390 (2019) to Q. Liu; Open Fund of Laboratory (20160215) at Sun Yat-sen University of  
391 China to X. Zhu; The National Natural Science Foundation of China (31330080),  
392 China Agriculture Research System (47) to J.H.; The National Natural Science  
393 Foundation of China (21601209) to Y.C.W. We thank technical help and suggestions  
394 from M. Jia, J. Zhou, Q. Zhi, Z. Tan, G. Yu, S. Li and S. Wang. Manuscript  
395 proofreading by Y. Shi is appreciated.

396

397

398

399

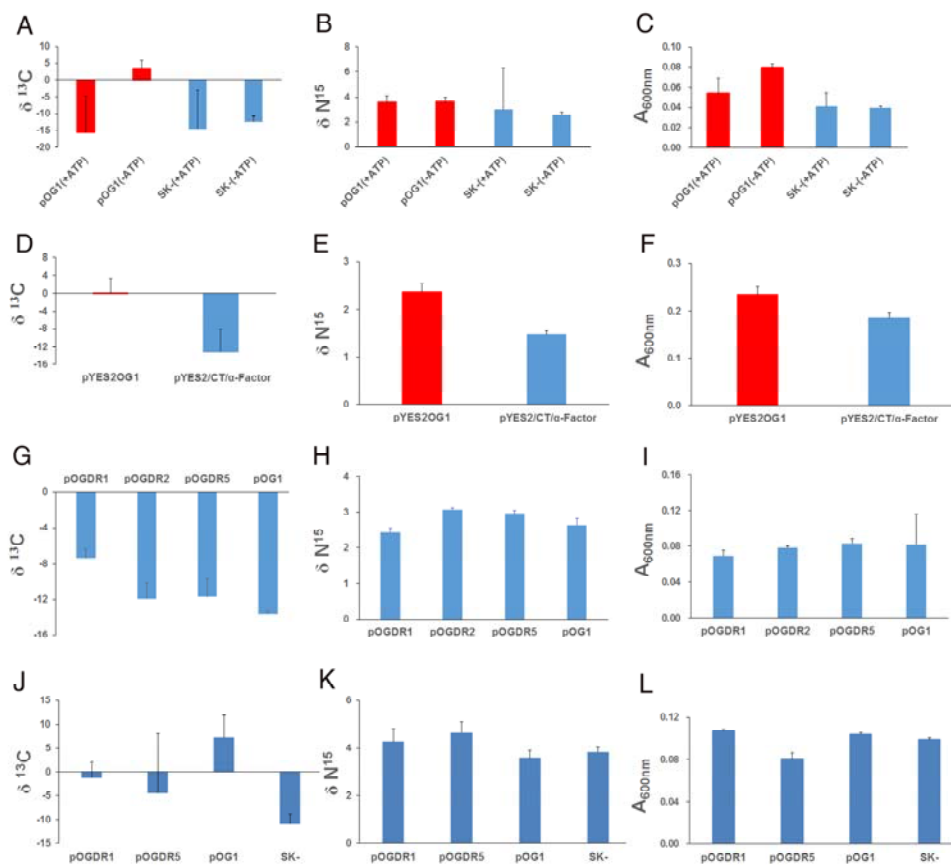

400

401 **Figure 1.**  $\delta^{13}\text{C}$  and  $\delta\text{N}^{15}$  for  $\text{CO}_2$  capture experiments

402 **A,B,C.** Effects of ATP usage on  $\delta^{13}\text{C}$ ,  $\delta\text{N}^{15}$ ,  $\text{OD}_{600\text{nm}}$  post-carbon capture. Orders of the rest of  
 403 the panels are likewise. **D.**  $\delta^{13}\text{C}$  with *S. cerevisiae* clones. **G.**  $\delta^{13}\text{C}$  by clones obtained via directed  
 404 evolution. From A to I, all were propagated in media at pH 8.0. **J.**  $\delta^{13}\text{C}$  from clones propagated in  
 405 media at pH 7.0. Statistical evaluations for  $\delta^{13}\text{C}$  are as follows (univariate General Linear Model,  
 406 two tailed, and  $n = 3$  unless specified): **A.** 0.041 (pOG1: ATP vs absence of ATP). **D.** 0.001  
 407 (pYES2OG1 vs pYES2/CT/ $\alpha$ -Factor;  $n=5$ ). **G.** 0.012 (pOG1 vs pOGDR1; Games-Howell post  
 408 hoc tests). **J.** 0.032 (pOG1 vs pSK-; Games-Howell post hoc tests), 0.047 (pSK- vs pOGDR1;  
 409 Games-Howell post hoc tests). The data were presented as average values with one standard  
 410 deviation.

411

412





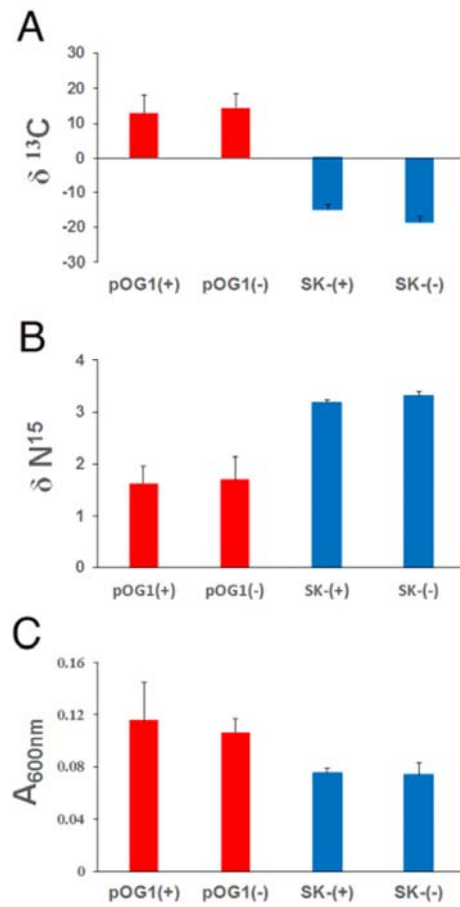

414

415 **Figure 2.** A, B, C. Effects of acetazolamide usage on  $\delta^{13}\text{C}$ ,  $\delta\text{N}^{15}$ , OD600nm post-carbon capture.

416 Treatments with carbonic anhydrase inhibitor acetazolamide (n=3). (+): Presence of 50  $\mu\text{g}/\text{ml}$

417 acetazolamide in the media. (-): No acetazolamide in the media. The data were presented as

418 average values with one standard deviation.

419

420

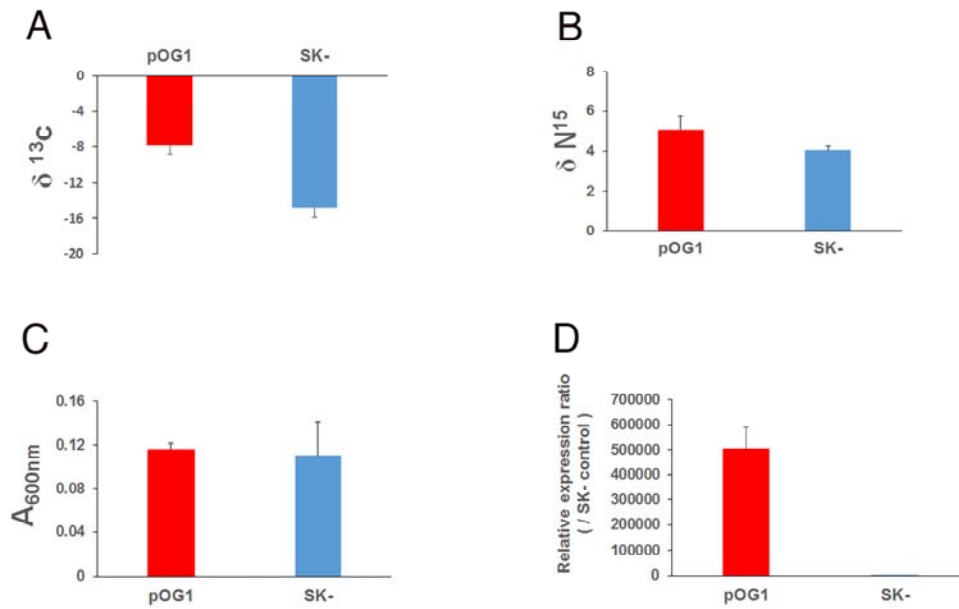

421

422 **Figure 3.** *OGI* gene expression in *E. coli* clones post- $\text{CO}_2$  capture.

423 **A.**  $\delta^{13}\text{C}$ . **B.**  $\delta^{15}\text{N}$ . **C.** OD<sub>600nm</sub> post- $\text{CO}_2$  capture. **D.** Relative gene expression of *OGI* in the ratio  
424 of gene expression in pOG1/pSK- clones in *E. coli* MG1655 cells. Statistical evaluations for  $\delta^{13}\text{C}$   
425 are as follows (two tailed, and n=3): **A.** 0.015 (pOG1 vs pSK-; univariate General Linear  
426 Model). **D.** 0.008 (pOG1 vs pSK-, t test). The data were presented as average values with one  
427 standard deviation.

428

429

430 **Table 1.** Mutants from directed evolution

| <b>Name</b> | <b>GenBank<br/>Accession no.</b> | <b>Site in the<br/>OG1 gene</b> | <b>DNA Base mutation</b> | <b>Amino acid<br/>substitution</b> |
|-------------|----------------------------------|---------------------------------|--------------------------|------------------------------------|
| pOGDR1      | MF968946                         | 322                             | C>A                      | P108T                              |
| pOGDR2      | MF968952                         | 237                             | T>C                      | Nonsense mutation                  |
| pOGDR3      | MF968947                         | 113                             | A>G                      | N38S                               |
| pOGDR4      | MF968948                         | 289                             | A>G                      | I97V                               |
| pOGDR5      | MF968949                         | 389,96                          | A>C, T>C                 | H130P                              |
| pOGDR6      | MF968950                         | 389                             | A>C                      | H130P                              |
| pOGDR7*     | JX462739                         | 269                             | A>G                      | Q90R                               |
| pOGDR10     | MF968951                         | 169                             | C>T                      | H57Y                               |

431 \*OGDR7 shares homology with *Homo sapiens isolate P75 mitochondrion*

432 (GenBank Accession no.: JX462739)
